# Supplementary material for: Engineered decalcified bone matrix/barium titanate piezoelectric composite scaffolds for bone regeneration
Source: Royal Society of Chemistry journal article supplement (doi:10.1039/d5tb00321k), 2025-01-01
Supplement: d5tb00321k1.pdf [file d5tb00321k1.pdf]

| Aspect             | Limitations of the existing Research                                                                                                                | Innovation Points                                                                                                                            |
|--------------------|-----------------------------------------------------------------------------------------------------------------------------------------------------|----------------------------------------------------------------------------------------------------------------------------------------------|
| Material Design    | The traditional material, demineralized bone matrix, which is most widely used in clinical applications, is insufficient in piezoelectricity.       | Piezoelectric materials possess excellent piezoelectric properties.                                                                          |
| Material Structure | Traditional decalcified bone matrix provides a framework for bone growth, but the pore size is too large, unsuitable for cell seeding and adhesion. | Gelatinization of decalcified bone matrix to provide a suitable porous structure for cell growth, with high porosity and controllable shape. |
| Material Function  | The osteogenic activity of single piezoelectric materials is insufficient.                                                                          | The synergistic effect of collagen, decalcified bone matrix, and piezoelectricity significantly improves osteogenic activity.                |

### Analysis of innovative aspects
